# Supplementary material for: MediMer: a versatile do-it-yourself peptide-receptive MHC class I multimer platform for tumor neoantigen-specific T cell detection
Source: Front Immunol. 2024 Jan 4;14:1294565. doi: 10.3389/fimmu.2023.1294565 (PMC10794645; doi:10.3389/fimmu.2023.1294565)
Supplement: Supplementary file 4 [file Table_1.xlsx]

## Sheet: ds_SCD_Yield_and_FITC_Peptides
	Supplementary Table 1 - CHO-based production efficiency of dsSCD and used binding and non-binding FITC-labled (*) peptides for dsSCD validation
	#	HLA-Allele	mg dsSCD yield / L CHO culture volume	Binding peptide K* marks FITC-lysine	%Rank EL score (neglecting FITC)	BindLevel	Original sequence	Organism	Epitope	IEDB ID of original sequence	Non-binding peptide K* marks FITC-lysine	%Rank EL score (neglecting FITC)	BindLevel	Original sequence	Organism	Epitope	IEDB ID of original sequence
	1	HLA-A*01:01	3	CTELK*LSDY	0.098	strong binder	CTELKLSDY	Influenza A	Nucleoprotein (342-351)	7136	NLVPK*VATV	10.5	Non binder	NLVPMVATV	HCMV	pp65 (495-503)	44920
	2	HLA-A*02:01	10	NLVPK*VATV	0.026	strong binder	NLVPMVATV	HCMV	pp65 (495-503)	44920	CTELK*LSDY	52.3	Non binder	CTELKLSDY	Influenza A	Nucleoprotein (342-351)	7136
	3	HLA-A*03:01	4.5	RIKEHMLK*K	0.006	strong binder	RIKEHMLKK	HCMV	IE1 (99-107)	186793	CTELK*LSDY	15.26	Non binder	CTELKLSDY	Influenza A	Nucleoprotein (342-351)	7136
	4	HLA-A*11:01	20.2	K*TFPPTEPK	0.002	strong binder	KTFPPTEPK	SARS-CoV2	Nucleoprotein (361-369)	33667	CTELK*LSDY	11	Non binder	CTELKLSDY	Influenza A	Nucleoprotein (342-351)	7136
	5	HLA-A*23:01	4.5	K*YIKWPWYIW	0.008	strong binder	QYIKWPWYIW	SARS-CoV2	S (1208-1217)	1323673	CTELK*LSDY	51	Non binder	CTELKLSDY	Influenza A	Nucleoprotein (342-351)	7136
	6	HLA-A*29:01	2.1	ATSK*TLSYY	0.072	strong binder	ATSRTLSYY	SARS-CoV2	Membrane protein (171-179)	5149	NLVPK*VATV	8.94	Non binder	NLVPMVATV	HCMV	pp65 (495-503)	44920
	7	HLA-A*29:02	5.3	ATSK*TLSYY	0.072	strong binder	ATSRTLSYY	SARS-CoV2	Membrane protein (171-179)	5149	NLVPK*VATV	8.94	Non binder	NLVPMVATV	HCMV	pp65 (495-503)	44920
	8	HLA-A*33:01	2.1	RLFFK*CIYRR	1.28	weak binder	RLFFKCIYRR	Influenza A	Matrix protein 2 (45-54)	144461	CTELK*LSDY	35.479	Non binder	CTELKLSDY	Influenza A	Nucleoprotein (342-351)	7136
	9	HLA-A*68:01	1	K*TFPPTEPK	0.242	strong binder	KTFPPTEPK	SARS-CoV2	Nucleoprotein (361-369)	33667	NLVPK*VATV	15.744	Non binder	NLVPMVATV	HCMV	pp65 (495-503)	44920
	10	HLA-A*68:02	8	ETVAIDK*PA	0.283	strong binder	ETVAIDRPA	YFV	EnvE (550-558)	606254	CTELK*LSDY	52.33	Non binder	CTELKLSDY	Influenza A	Nucleoprotein (342-351)	7136
	11	HLA-B*07:02	2	LPFDK*TTVM	0.065	strong binder	LPFDRTTVM	Influenza A	Nucleocapsid (418-426)	1679255	RIKEHMLK*K	11.367	Non binder	RIKEHMLKK	HCMV	IE1 (99-107)	186793
	12	HLA-B*08:01	9.3	K*LRRKMMYM	0.31	strong binder	ELRRKMMYM	HCMV	IE1 (199-207)	13257	ETVAIDK*PA	42.4	Non binder	ETVAIDRPA	YFV	EnvE (550-558)	606254
	13	HLA-B*13:02	1.8	K*LQSLQTYV	0.038	strong binder	RLQSLQTYV	SARS-CoV2	S (1000-1008)	54725	CTELK*LSDY	60.849	Non binder	CTELKLSDY	Influenza A	Nucleoprotein (342-351)	7136
	14	HLA-B*14:02	1	K*RYQRTKAL	0.009	strong binder	TTYQRTRAL	Influenza A	Nucleoprotein (146-154)	66924	CTELK*LSDY	58.75	Non binder	CTELKLSDY	Influenza A	Nucleoprotein (342-351)	7136
	15	HLA-B*27:05	2.8	RRIYDLK*EL	0.103	strong binder	RRIYDLIEL	EBV	EBNA3C (258-266)	55620	NLVPK*VATV	12.435	Non binder	NLVPMVATV	HCMV	pp65 (495-503)	44920
	16	HLA-B*35:01	4.7	LPFDK*TTVM	0.005	strong binder	LPFDRTTVM	Influenza A	NP (418-426)	1679255	RIKEHMLK*K	34.286	Non binder	RIKEHMLKK	HCMV	IE1 (99-107)	186793
	17	HLA-B*49:01	1.1	K*EYVSQPFL	0.057	strong binder	FEYVSQPFL	SARS-CoV2	S (168-176)	1312410	NLVPK*VATV	6.553	Non binder	NLVPMVATV	HCMV	pp65 (495-503)	44920
	18	HLA-B*51:01	3.4	LPFDK*TTVM	0.015	strong binder	LPFDRTTVM	Influenza A	NP (418-426)	1679255	RIKEHMLK*K	40.474	Non binder	RIKEHMLKK	HCMV	IE1 (99-107)	186793
	19	HLA-C*03:03	4.5	K*AVEPGTVL	0.002	strong binder	RAVEPGTVL	E. coli	YbhG (218-226)	109792	RIKEHMLK*K	27.75	Non binder	RIKEHMLKK	HCMV	IE1 (99-107)	186793
	20	HLA-C*03:04	8.4	K*AVEPGTVL	0.002	strong binder	RAVEPGTVL	E. coli	YbhG (218-226)	109792	RIKEHMLK*K	27.75	Non binder	RIKEHMLKK	HCMV	IE1 (99-107)	186793
	21	HLA-C*04:01	1.2	K*YDPVAALF	0.002	strong binder	KDVALRHVV	HCMV	pp65 (181-189)	122808	RIKEHMLK*K	9.081	Non binder	RIKEHMLKK	HCMV	IE1 (99-107)	186793
	22	HLA-C*05:01	4.1	IIDK*SGSTV	0.032	strong binder	IIDKSGSTV	Human	AP-3 (190-198)	604454	RIKEHMLK*K	27.75	Non binder	RIKEHMLKK	HCMV	IE1 (99-107)	186793
	23	HLA-C*06:02	14.3	K*RYQRTKAL	0.015	strong binder	TTYQRTRAL	Influenza A	Nucleoprotein (146-154)	66924	CTELK*LSDY	20.33	Non binder	CTELKLSDY	Influenza A	Nucleoprotein (342-351)	7136
	24	HLA-C*07:01	11.4	K*RLNFITEY	0.009	strong binder	KRLNFITEY	Human	LIM domain kinase 1 (407-415)	445918	ETVAIDK*PA	51.667	Non binder	ETVAIDRPA	YFV	EnvE (550-558)	606254
	25	HLA-C*07:02	5.6	K*RLNFITEY	0.012	strong binder	KRLNFITEY	Human	LIM domain kinase 1 (407-415)	445918	ETVAIDK*PA	70	Non binder	ETVAIDRPA	YFV	EnvE (550-558)	606254
	26	HLA-C*08:02	4.2	IIDK*SGSTV	0.138	strong binder	IIDKSGSTV	Human	AP-3 (190-198)	604454	RIKEHMLK*K	27.75	Non binder	RIKEHMLKK	HCMV	IE1 (99-107)	186793
	27	HLA-C*12:03	6.9	FAVDK*ARAY	0.001	strong binder	FAVDAAKAY	SARS-CoV2	orf 1ab (4272-4280)	1331939	IIDK*SGSTV	4.243	Non binder	IIDKSGSTV	Human	AP-3 (190-198)	604454
	28	HLA-C*14:02	3.6	K*FIASFRLF	0.133	strong binder	YFIASFRLF	SARS-CoV2	Membrane protein (95-103)	1313989	ERLK*IRGSL	5.716	Non binder	ERLKIRGSL	Human	40S ribosomal subunit S25 (75-83)	14027
	29	HLA-C*15:02	2	K*LQSLQTYV	1.196	weak binder	RLQSLQTYV	SARS-CoV2	S (1000-1008)	54725	CTELK*LSDY	26	Non binder	CTELKLSDY	Influenza A	Nucleoprotein (342-351)	7136
	30	HLA-C*16:01	1	FAVDK*ARAY	0.002	strong binder	FAVDAAKAY	SARS-CoV2	orf 1ab (4272-4280)	1331939	K*LQSLQTYV	8.795	Non binder	RLQSLQTYV	SARS-CoV2	S (1000-1008)	54725
	31	HLA-C*16:04	8.5	FAVDK*ARAY	0.002	strong binder	FAVDAAKAY	SARS-CoV2	orf 1ab (4272-4280)	1331939	K*LQSLQTYV	8.795	Non binder	RLQSLQTYV	SARS-CoV2	S (1000-1008)	54725
	32	HLA-C*17:01	2.5	YVTPK*ALEL	0.003	strong binder	YVTPRALEL	Burkholderia mallei	N‐ethylmaleimide reductase 137‐145	127497	CTELK*LSDY	33.429	Non binder	CTELKLSDY	Influenza A	Nucleoprotein (342-351)	7136
		Average	5.15625
